# Supplementary material for: Comparison of the Quality of Hospitals That Admit Medicare Advantage Patients vs Traditional Medicare Patients
Source: PubMed Central journal article supplement (PMC6991262; doi:10.1001/jamanetworkopen.2019.19310), 2020-01-15
Supplement: jamanetwopen-3-e1919310-s001.pdf [file jamanetwopen-3-e1919310-s001.pdf]

## Supplementary Online Content

Meyers DJ, Trivedi AN, Mor V, Rahman M. Comparison of the quality of hospitals that admit Medicare Advantage patients vs traditional Medicare patients. *JAMA Netw Open*. 2020;3(1):e1919310. doi:10.1001/jamanetworkopen.2019.19310

**eTable 1.** Full Regression Output for Primary Models

**eFigure 1.** Trends in Share of MA and TM Patients Admitted to 4-5 Star Hospitals Between 2012-2016

**eFigure 2.** Share of MA and TM Patients Admitted to Hospitals in Neighborhoods With Different Proximity to Hospitals, Emergency and Non-emergency Admissions

**eTable 2.** Multinomial Logit Regression Comparison

**eTable 3.** Alternative Model and Sample Specifications: Star Rating

**eTable 4.** Alternative Model and Sample Specifications: Readmissions

**eTable 5.** Comparing Primary Outcomes Using Linear Probability Models Adjusted for Zipcode Fixed Effects

This supplementary material has been provided by the authors to give readers additional information about their work.

**eTable 1:** Full regression output for primary models

|                                              | Star Rating       |                   |                   |                   | 30-Day Readmissions |                   |                   |                   |
|----------------------------------------------|-------------------|-------------------|-------------------|-------------------|---------------------|-------------------|-------------------|-------------------|
|                                              | Non-Emergency     |                   | Emergency         |                   | Non-Emergency       |                   | Emergency         |                   |
|                                              | Low Star (1)      | High Star (5)     | Low Star (1)      | High Star (5)     | Lowest Quintile     | Highest Quintile  | Lowest Quintile   | Highest Quintile  |
| MA                                           | -0.239**          | -0.234**          | -0.017*           | -0.009            | -0.195**            | -0.273**          | 0.006             | 0.008             |
|                                              | (-0.261 -- 0.217) | (-0.258 -- 0.210) | (-0.030 -- 0.004) | (-0.022 -- 0.004) | (-0.221 -- 0.168)   | (-0.296 -- 0.250) | (-0.008 -- 0.019) | (-0.006 -- 0.021) |
| Age                                          | -0.005**          | -0.001**          | -0.003**          | 0.001**           | 0.002**             | -0.007**          | 0.003**           | -0.004**          |
|                                              | (-0.006 -- 0.005) | (-0.002 -- 0.001) | (-0.003 -- 0.003) | (0.001 -- 0.001)  | (0.001 -- 0.002)    | (-0.008 -- 0.006) | (0.003 -- 0.004)  | (-0.004 -- 0.003) |
| Race, black                                  | 0.076**           | -0.086**          | 0.105**           | -0.065**          | -0.049**            | 0.105**           | -0.064**          | 0.129**           |
|                                              | (0.059 -- 0.093)  | (-0.103 -- 0.069) | (0.089 -- 0.121)  | (-0.081 -- 0.049) | (-0.067 -- 0.030)   | (0.088 -- 0.122)  | (-0.081 -- 0.046) | (0.112 -- 0.146)  |
| Race, other                                  | -0.004            | 0.062**           | 0.009             | 0.041**           | -0.036**            | 0.022             | -0.071**          | 0.045**           |
|                                              | (-0.029 -- 0.022) | (0.037 -- 0.087)  | (-0.017 -- 0.036) | (0.011 -- 0.071)  | (-0.062 -- 0.010)   | (-0.004 -- 0.047) | (-0.101 -- 0.042) | (0.021 -- 0.069)  |
| Race, Hispanic                               | 0.129**           | 0.096**           | 0.010             | 0.080**           | 0.042               | 0.212**           | 0.083**           | 0.095**           |
|                                              | (0.092 -- 0.166)  | (0.057 -- 0.136)  | (-0.016 -- 0.035) | (0.048 -- 0.112)  | (-0.001 -- 0.085)   | (0.170 -- 0.255)  | (0.041 -- 0.126)  | (0.058 -- 0.131)  |
| Race, Asian                                  | 0.132**           | -0.035*           | 0.045**           | -0.034**          | -0.054**            | 0.122**           | -0.055**          | 0.066**           |
|                                              | (0.106 -- 0.158)  | (-0.063 -- 0.007) | (0.027 -- 0.064)  | (-0.054 -- 0.014) | (-0.083 -- 0.025)   | (0.095 -- 0.150)  | (-0.077 -- 0.033) | (0.047 -- 0.085)  |
| Race, AI/NA                                  | 0.142*            | -0.330**          | -0.113*           | -0.593**          | 0.201               | -0.410**          | 0.315**           | -0.238**          |
|                                              | (0.012 -- 0.272)  | (-0.493 -- 0.168) | (-0.212 -- 0.014) | (-0.768 -- 0.418) | (-0.031 -- 0.433)   | (-0.561 -- 0.260) | (0.155 -- 0.474)  | (-0.378 -- 0.097) |
| Gender                                       | -0.045**          | 0.005             | -0.033**          | 0.004             | 0.012**             | -0.062**          | -0.001            | -0.022**          |
|                                              | (-0.053 -- 0.038) | (-0.002 -- 0.012) | (-0.038 -- 0.028) | (-0.001 -- 0.009) | (0.005 -- 0.019)    | (-0.069 -- 0.054) | (-0.007 -- 0.004) | (-0.027 -- 0.016) |
| Dual Eligibility                             | 0.131**           | -0.140**          | 0.092**           | -0.086**          | -0.095**            | 0.109**           | -0.059**          | 0.082**           |
|                                              | (0.118 -- 0.144)  | (-0.153 -- 0.127) | (0.083 -- 0.102)  | (-0.095 -- 0.076) | (-0.109 -- 0.081)   | (0.095 -- 0.123)  | (-0.070 -- 0.048) | (0.072 -- 0.093)  |
| Distance to Nearest High Quality Facility    | 0.011**           | -0.040**          | 0.004             | -0.107**          | -0.054**            | 0.001**           | -0.139**          | 0.002**           |
|                                              | (0.007 -- 0.014)  | (-0.043 -- 0.036) | (-0.001 -- 0.009) | (-0.112 -- 0.101) | (-0.056 -- 0.052)   | (0.001 -- 0.001)  | (-0.142 -- 0.135) | (0.001 -- 0.002)  |
| Distance to Nearest Average Quality Facility | 0.050**           | 0.030**           | 0.143**           | 0.098**           | 0.003**             | -0.055**          | 0.001**           | -0.138**          |
|                                              | (0.047 -- 0.053)  | (0.028 -- 0.032)  | (0.138 -- 0.148)  | (0.094 -- 0.103)  | (0.002 -- 0.003)    | (-0.056 -- 0.053) | (0.001 -- 0.002)  | (-0.142 -- 0.134) |
| Distance to Average Low Quality Facility     | -0.048**          | -0.000            | -0.129**          | -0.001            | 0.054**             | 0.048**           | 0.151**           | 0.153**           |
|                                              | (-0.050 -- 0.046) | (-0.001 -- 0.001) | (-0.133 -- 0.125) | (-0.002 -- 0.000) | (0.051 -- 0.057)    | (0.045 -- 0.051)  | (0.147 -- 0.155)  | (0.148 -- 0.158)  |
| Constant                                     | -0.318            | -3.065**          | -1.156            | -5.711**          | 3.217**             | -1.844**          | 1.148             | -2.117**          |
|                                              | (-1.257 -- 0.621) | (-3.918 -- 2.212) | (-2.367 -- 0.055) | (-6.995 -- 4.427) | (2.348 -- 4.085)    | (-2.760 -- 0.927) | (-0.012 -- 2.307) | (-3.286 -- 0.948) |
| Observations                                 | 3,187,171         | 3,187,171         | 7,661,256         | 7,661,256         | 3,187,171           | 3,187,171         | 7,661,256         | 7,661,256         |

\*All models are multinomial logit Mundlak models.

eFigure 1: Trends in share of MA and TM patients admitted to 4-5 star hospitals between 2012-2016

Emergency

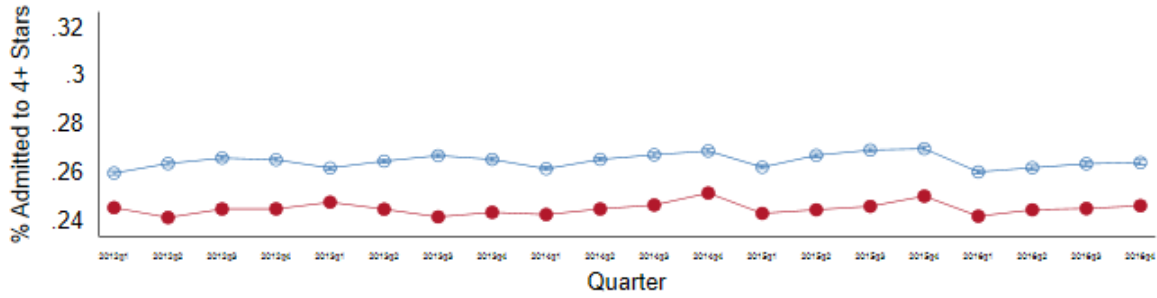

Non-Emergency

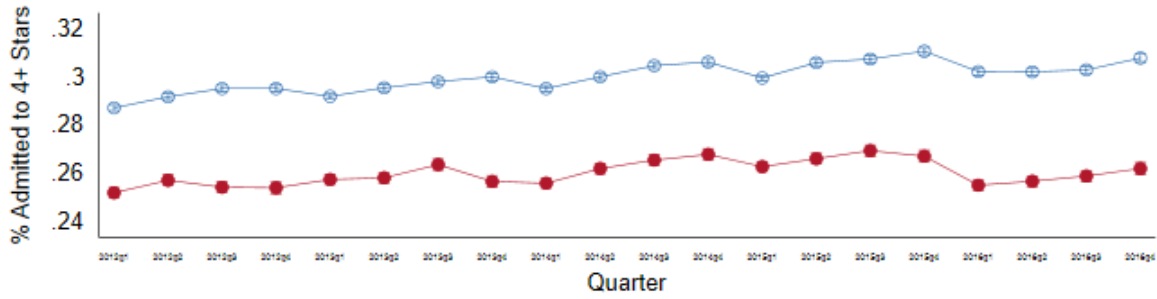

— FFS — MA

**Notes:** Figure shows the unadjusted admission rates into a 4+ star hospital by FFS and MA status at the time of admission quarterly from 2012-2016. Panel A displays admissions for emergency admissions while Panel B displays non-emergency admissions. Star rating of hospital is defined in 2016 and applied backwards to previous years.

**eFigure 2:** Share of MA and TM patients admitted to hospitals in neighborhoods with different proximity to hospitals, emergency and non-emergency admissions

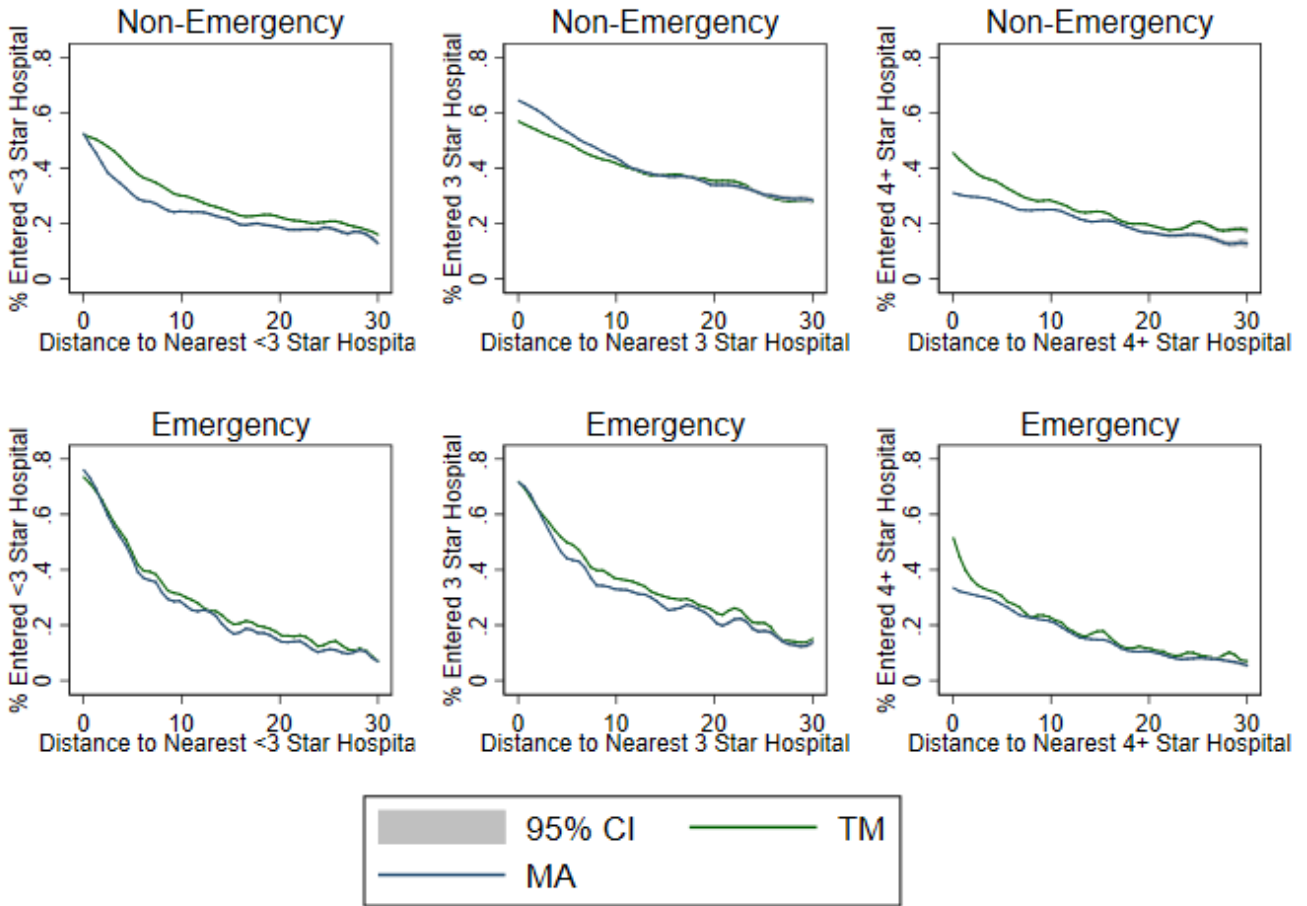

**eTable 2: Multinomial Logit Regression Comparison**

|                                |                  | Non-Emergency       |                   |                     |              | Emergency           |                     |                     |              |
|--------------------------------|------------------|---------------------|-------------------|---------------------|--------------|---------------------|---------------------|---------------------|--------------|
|                                |                  | TM n (%)            | MA n (%)          | Adjusted Difference | 95% CI       | TM n (%)            | MA n (%)            | Adjusted Difference | 95% CI       |
| Star Rating                    | 1-2 Stars        | 639,283<br>(26.9)   | 250,783<br>(25.9) | -2.8%**             | (-2.9, -2.7) | 1,826,657<br>(31.3) | 739,628<br>(34.2)   | 0.4%**              | (0.4, 0.5)   |
|                                | 3 Stars          | 990,219<br>(41.7)   | 454,209<br>(46.9) | 5.4%**              | (5.3, 5.7)   | 2,398,139<br>(41.0) | 873,157<br>(40.4)   | -0.4%**             | (-0.5, -0.3) |
|                                | 4-5 Stars        | 668,718<br>(28.2)   | 235,724<br>(24.3) | -2.6%**             | (-2.7, -2.5) | 1,455,502<br>(24.9) | 510,110<br>(23.6)   | 0.0%                | (-0.0, -0.0) |
| 30-Day Readmissions            | Lowest Quintile  | 595,117<br>(25.7)   | 228,274<br>(23.7) | -1.8**              | (-1.9, -1.8) | 1,263,976<br>(22.2) | 490,604<br>(22.8)   | 0.5**               | (0.4, 0.5)   |
|                                | Quintiles 2-4    | 1,159,142<br>(50.1) | 522,258<br>(54.2) | 5.6**               | (5.5, 5.8)   | 2,896,496<br>(50.9) | 1,039,748<br>(48.3) | -0.9**              | (-0.9, -0.8) |
|                                | Highest Quintile | 558,439<br>(24.2)   | 212,372<br>(22.1) | -3.8**              | (-3.9, -3.7) | 1,530,188<br>(26.9) | 623,335<br>(28.94)  | 0.4**               | (0.4, 0.5)   |
| 30-Day AMI Mortality           | Lowest Quintile  | 639,880<br>(44.7)   | 218,578<br>(42.9) | -2.5**              | (-2.5, -2.4) | 1,467,033<br>(42.2) | 515,293<br>(39.7)   | -1.7**              | (-1.8, -1.7) |
|                                | Quintiles 2-4    | 416,473<br>(29.1)   | 145,473<br>(28.5) | 1.7**               | (1.6, 1.8)   | 1,058,714<br>(30.5) | 403,472<br>(31.1)   | 1.0**               | (0.9, 1.1)   |
|                                | Highest Quintile | 375,205<br>(26.2)   | 145,660<br>(28.6) | 0.7**               | (0.7, 0.8)   | 950,331<br>(27.3)   | 390,838<br>(29.3)   | 0.8**               | (0.7, 0.8)   |
| 30-Day Stroke Mortality        | Lowest Quintile  | 513,453<br>(35.4)   | 181,161<br>(33.9) | -2.8**              | (-2.7, -2.5) | 1,409,930<br>(39.3) | 523,621<br>(38.2)   | -0.9**              | (-1.0, -0.9) |
|                                | Quintiles 2-4    | 397,952<br>(27.5)   | 148,400<br>(27.8) | -2.3**              | (2.2, 2.4)   | 1,028,907<br>(28.6) | 387,949<br>(28.3)   | 0.2**               | (0.1, 0.3)   |
|                                | Highest Quintile | 538,274<br>(37.1)   | 204,443<br>(38.2) | 0.3**               | (0.2, 0.4)   | 1,153,898<br>(32.1) | 460,065<br>(33.5)   | 0.7**               | (0.7, 0.8)   |
| 30-Day CABG Mortality          | Lowest Quintile  | 471,340<br>(42.7)   | 153,775<br>(39.2) | -1.9**              | (-2.1, -1.8) | 902,536<br>(39.3)   | 306,866<br>(35.1)   | -1.8**              | (-1.8, -1.7) |
|                                | Quintiles 2-4    | 369,753<br>(33.5)   | 156,630<br>(39.9) | 2.2**               | (2.1, 2.3)   | 806,390<br>(35.1)   | 350,434<br>(40.1)   | 1.1**               | (1.1, 1.2)   |
|                                | Highest Quintile | 263,746<br>(20.98)  | 82,399<br>(20.9)  | -0.2**              | (-0.3, -0.1) | 586,931<br>(25.6)   | 215,988<br>(24.7)   | 0.6**               | (0.6, 0.7)   |
| 30-Day COPD Mortality          | Lowest Quintile  | 533,412<br>(36.6)   | 176,167<br>(44.7) | -2.7**              | (-2.7, 2.6)  | 1,387,711<br>(38.5) | 496,181<br>(37.7)   | -1.5**              | (-1.6, -1.4) |
|                                | Quintiles 2-4    | 462,935<br>(31.8)   | 174,332<br>(34.3) | 2.8**               | (2.6, 2.9)   | 1,142,315<br>(31.7) | 443,875<br>(33.7)   | 2.0**               | (1.9, 2.1)   |
|                                | Highest Quintile | 461,314<br>(31.7)   | 157,685<br>(31.0) | -0.0                | (0.0, 0.0)   | 1,076,513<br>(29.9) | 375,797<br>(28.6)   | -0.5**              | (-0.5, -0.4) |
| 30-Day Heart Disease Mortality | Lowest Quintile  | 668,376<br>(45.1)   | 234,036<br>(44.4) | -4.1**              | (-4.1, -4.0) | 1,655,403<br>(45.2) | 598,222<br>(43.6)   | -2.7**              | (-2.8, -2.7) |
|                                | Quintiles 2-4    | 406,367<br>(27.4)   | 156,601<br>(29.7) | 4.2**               | (4.1, 4.3)   | 1,081,716<br>(29.3) | 437,341<br>(31.9)   | 2.5**               | (2.4, 2.6)   |
|                                | Highest Quintile | 407,246<br>(27.5)   | 136,381<br>(25.9) | -0.1*               | (-0.2, -0.0) | 941,702<br>(25.5)   | 335,853<br>(24.5)   | 0.2**               | (0.2, 0.3)   |

\* denotes p<0.05, \*\* denotes p<0.001

Results in the multinomial logit model come from a single multinomial in each emergency category, adjusting for gender, age, dual eligibility status, and race/ethnicity.

**eTable 3:** Alternative model and sample specifications: star rating

|                                                           |                         | Emergency           |             | Non-Emergency       |             |
|-----------------------------------------------------------|-------------------------|---------------------|-------------|---------------------|-------------|
|                                                           |                         | Adjusted Difference |             | Adjusted Difference |             |
|                                                           |                         | (95% CI)            |             | (95% CI)            |             |
| Dual Eligible                                             | Low Rated (1-2 Stars)   | -1.3%**             | (-1.3--1.1) | -0.3%**             | (-0.3--0.1) |
|                                                           | Average Rated (3 Stars) | 6.3%**              | (6-6.5)     | 0.00%               | (0-0.1)     |
|                                                           | High Rated (4-5 Stars)  | -2.1%**             | (-2.3--1.9) | 0.10%               | (0-0.1)     |
| Not Dual Eligible                                         | Low Rated (1-2 Stars)   | -3.4%**             | (-3.5--3.1) | 0.00%               | (-0.1-0)    |
|                                                           | Average Rated (3 Stars) | 3.2%**              | (3-3.2)     | 0.4%**              | (0.3-0.4)   |
|                                                           | High Rated (4-5 Stars)  | -2.0%**             | (-2.1--1.8) | -0.1%**             | (-0.1-0)    |
| Rural                                                     | Low Rated (1-2 Stars)   | -0.10%              | (-0.2-0.1)  | -0.10%              | (-0.2-0)    |
|                                                           | Average Rated (3 Stars) | 0.10%               | (-0.1-0.3)  | -0.10%              | (-0.2-0.1)  |
|                                                           | High Rated (4-5 Stars)  | -0.10%              | (-0.3-0)    | 0.2%**              | (0-0.3)     |
| Not Rural                                                 | Low Rated (1-2 Stars)   | -2.1%**             | (-2.1--1.9) | -0.2%**             | (-0.2--0.1) |
|                                                           | Average Rated (3 Stars) | 4.8%**              | (4.6-4.9)   | 0.4%**              | (0.3-0.4)   |
|                                                           | High Rated (4-5 Stars)  | -2.6%**             | (-2.7--2.4) | -0.2%**             | (-0.2-0)    |
| 3+ Comorbidities                                          | Low Rated (1-2 Stars)   | -1.8%**             | (-1.9--1.7) | -0.1%**             | (-0.1-0)    |
|                                                           | Average Rated (3 Stars) | 4.4%**              | (4.2-4.5)   | 0.3%**              | (0.2-0.3)   |
|                                                           | High Rated (4-5 Stars)  | -2.2%**             | (-2.3--2)   | -0.1%**             | (-0.1-0)    |
| Diagnosis 1                                               | Low Rated (1-2 Stars)   | -1.1%**             | (-1.4--0.8) | -0.9%**             | (-1.2--0.6) |
|                                                           | Average Rated (3 Stars) | 1.8%**              | (1.4-2.2)   | 2.5%**              | (1.9-2.9)   |
|                                                           | High Rated (4-5 Stars)  | -2.3%**             | (-2.6--1.9) | -3.0%**             | (-3.4--2.5) |
| Diagnosis 2                                               | Low Rated (1-2 Stars)   | 3.3%**              | (-1.9--0.4) | -0.10%              | (-0.3-0)    |
|                                                           | Average Rated (3 Stars) | 3.3%**              | (2.3-4.1)   | 0.2%**              | (0-0.3)     |
|                                                           | High Rated (4-5 Stars)  | -1.9%**             | (-2.7--1.1) | 0.00%               | (-0.1-0.1)  |
| Diagnosis 3                                               | Low Rated (1-2 Stars)   | -0.10%              | (-0.3-0.1)  | -0.6%**             | (-0.8--0.3) |
|                                                           | Average Rated (3 Stars) | 0.5%**              | (0.1-0.8)   | 0.5%**              | (0.2-0.8)   |
|                                                           | High Rated (4-5 Stars)  | -0.20%              | (-0.5-0)    | 0.10%               | (-0.1-0.3)  |
| Adjusting for ICU use and Elixhuaser Index                | Low Rated (1-2 Stars)   | -1.7%**             | (-1.7--1.5) | -0.3%**             | (-0.3--0.2) |
|                                                           | Average Rated (3 Stars) | 3.8%**              | (3.6-3.9)   | 0.4%**              | (0.3-0.4)   |
|                                                           | High Rated (4-5 Stars)  | -2.1%**             | (-2.1--1.9) | -0.1%**             | (-0.1-0)    |
| Excluding prior hospitalization and subsequent admissions | Low Rated (1-2 Stars)   | -1.7%**             | (-1.8--1.5) | -0.2%**             | (-0.2--0.1) |
|                                                           | Average Rated (3 Stars) | 3.9%**              | (3.7-3.9)   | 0.3%**              | (0.2-0.3)   |
|                                                           | High Rated (4-5 Stars)  | -2.4%**             | (-2.4--2.2) | -0.1%**             | (-0.1-0)    |
| Propensity Score Weighed                                  | Low Rated (1-2 Stars)   | -1.2**              | (-1.3--1.1) | -0.0                | (-0.0-0.0)  |
|                                                           | Average Rated (3 Stars) | 3.1**               | (3.0-3.3)   | 0.2**               | (0.2-0.3)   |
|                                                           | High Rated (4-5 Stars)  | -1.8**              | (-1.9--1.7) | -0.1**              | (-0.2--0.0) |

**Notes:** \* denotes p<0.05, \*\* denotes p<0.001. Dual eligibility status comes from the master beneficiary summary file. Rurality is of the patient's zipcode. 3+ comorbidities are based off of the Elixhuaser comorbidity index of the given

hospitalization's diagnoses codes. The top three diagnoses for non-emergency were hip and knee osteoarthritis, and Coronary atherosclerosis. The top three diagnoses for emergency admissions are septicemia, pneumonia, and acute myocardial infarction. The second to last sensitivity rows additionally include ICU use and the Elixhauser index in the model as covariates. In the final check, we exclude patients who had a hospitalization or nursing home stay in the prior 6 months, and only include the first hospitalization of the year in the models.

**eTable 4:** Alternative model and sample specifications: readmissions

|                                                           |               | Emergency           |             | Non-Emergency       |             |
|-----------------------------------------------------------|---------------|---------------------|-------------|---------------------|-------------|
|                                                           |               | Adjusted Difference |             | Adjusted Difference |             |
|                                                           |               | (95% CI)            |             | (95% CI)            |             |
| Dual Eligible                                             | Quintile 1    | -1.1**              | (-1.3--1.0) | 0.2**               | (0.1-0.3)   |
|                                                           | Quintiles 2-4 | 4.5**               | (4.2-4.8)   | -0.0                | (-0.2-0.0)  |
|                                                           | Quintile 5    | -3.1**              | (-3.3--2.9) | -0.0                | (-0.2-0.0)  |
| Not Dual Eligible                                         | Quintile 1    | -1.5**              | (-1.6--1.4) | 0.2**               | (0.2-0.3)   |
|                                                           | Quintiles 2-4 | 3.3**               | (3.2-3.4)   | -0.0                | (-0.1-0.0)  |
|                                                           | Quintile 5    | -1.6**              | (-1.7--1.5) | -0.1**              | (-0.2-0.0)  |
| Rural                                                     | Quintile 1    | -0.1                | (-0.3-0.0)  | 0.4**               | (0.3-0.5)   |
|                                                           | Quintiles 2-4 | 0.3*                | (0.0-0.5)   | -0.4**              | (-0.5--0.2) |
|                                                           | Quintile 5    | -0.1                | (-0.3-0.0)  | -0.0                | (0.1-0.0)   |
| Not Rural                                                 | Quintile 1    | -1.7**              | (-1.8--1.6) | 0.2**               | (0.1-0.2)   |
|                                                           | Quintiles 2-4 | 4.4**               | (4.3-4.5)   | 0.0                 | (0.0-0.0)   |
|                                                           | Quintile 5    | -2.4**              | (-2.5--2.3) | -0.2**              | (-0.2--0.1) |
| 3+ Comorbidities                                          | Quintile 1    | -1.3**              | (-1.5--1.3) | 0.2**               | (0.2-0.3)   |
|                                                           | Quintiles 2-4 | 3.8**               | (3.7-4.0)   | 0.0                 | (0.0-0.0)   |
|                                                           | Quintile 5    | -2.2**              | (-2.3--2.0) | -0.2**              | (-0.2--0.1) |
| Diagnosis 1                                               | Quintile 1    | -2.2**              | (-2.5--1.8) | 0.4**               | (0.1-0.5)   |
|                                                           | Quintiles 2-4 | 2.8**               | (2.3-3.1)   | -0.2                | (-0.4-0.0)  |
|                                                           | Quintile 5    | -0.5**              | (-0.8--0.2) | -0.1                | (-0.3-0.0)  |
| Diagnosis 2                                               | Quintile 1    | -3.2**              | (-3.8--2.8) | -0.1                | (-0.4-0.1)  |
|                                                           | Quintiles 2-4 | 3.9**               | (3.4-4.4)   | 0.3*                | (0.0-0.7)   |
|                                                           | Quintile 5    | -0.7**              | (-1.0--0.3) | -0.2                | (-0.4-0.0)  |
| Diagnosis 3                                               | Quintile 1    | -2.9**              | (-3.6--2.3) | 0.1                 | (-0.1-0.3)  |
|                                                           | Quintiles 2-4 | 4.2**               | (3.4-5.1)   | 0.3                 | (-0.0-0.6)  |
|                                                           | Quintile 5    | -1.3**              | (-1.9--0.5) | -0.3*               | (-0.6--0.0) |
| Adjusting for ICU use and Elixhuaser Index                | Quintile 1    | -1.4**              | (-1.5--1.3) | 0.2**               | (0.2-0.3)   |
|                                                           | Quintiles 2-4 | 3.6**               | (3.4-3.7)   | 0.0                 | (-0.0-0.0)  |
|                                                           | Quintile 5    | -1.9**              | (-2.0--1.8) | -0.2**              | (-0.2--0.1) |
| Excluding prior hospitalization and subsequent admissions | Quintile 1    | -1.6**              | (-1.7--1.5) | 0.2**               | (0.1-0.2)   |
|                                                           | Quintiles 2-4 | 3.4**               | (3.3-3.6)   | -0.0                | (-0.1-0.0)  |
|                                                           | Quintile 5    | -1.6**              | (-1.7--1.5) | -0.0*               | (-0.2--0.0) |
| Propensity Score Weighed                                  | Quintile 1    | -1.1**              | (-1.1--1.0) | 0.2**               | (0.2-0.2)   |
|                                                           | Quintiles 2-4 | 2.8**               | (2.7-2.9)   | -0.0                | (0.0-0.0)   |
|                                                           | Quintile 5    | -1.5**              | (-1.6--1.4) | -0.1**              | (-0.2--0.1) |

**Notes:** \* denotes p<0.05, \*\* denotes p<0.001. Dual eligibility status comes from the master beneficiary summary file. Rurality is of the patient's zipcode. 3+ comorbidities are based off of the Elixhuaser comorbidity index of the given



hospitalization's diagnoses codes. The top three diagnoses for non-emergency were hip and knee osteoarthritis, and Coronary atherosclerosis. The top three diagnoses for emergency admissions are septicemia, pneumonia, and acute myocardial infarction. The second to last sensitivity rows additionally include ICU use and the Elixhauser index in the model as covariates. In the final check, we exclude patients who had a hospitalization or nursing home stay in the prior 6 months, and only include the first hospitalization of the year in the models.

**eTable 5: Comparing primary outcomes using linear probability models adjusted for zipcode fixed effects**

|                                |                  | Non-Emergency       |                   |                     |             | Emergency           |                     |                     |             |
|--------------------------------|------------------|---------------------|-------------------|---------------------|-------------|---------------------|---------------------|---------------------|-------------|
|                                |                  | TM n (%)            | MA n (%)          | Adjusted Difference | 95% CI      | TM n (%)            | MA n (%)            | Adjusted Difference | 95% CI      |
| Star Rating                    | 1-2 Stars        | 639,283<br>(26.9)   | 250,783<br>(25.9) | -1.7**              | (-1.8--1.6) | 1,826,657<br>(31.3) | 739,628<br>(34.2)   | -0.2**              | (-0.3--0.2) |
|                                | 3 Stars          | 990,219<br>(41.7)   | 454,209<br>(46.9) | 3.8**               | (3.7-4.0)   | 2,398,139<br>(41.0) | 873,157<br>(40.4)   | 0.4**               | (0.3-0.4)   |
|                                | 4-5 Stars        | 668,718<br>(28.2)   | 235,724<br>(24.3) | -2.1**              | (-2.2--2.0) | 1,455,502<br>(24.9) | 510,110<br>(23.6)   | 0.08**              | (0.1-0.03)  |
| 30-Day Readmissions            | Lowest Quintile  | 595,117<br>(25.7)   | 228,274<br>(23.7) | -1.4**              | (-1.4--1.3) | 1,263,976<br>(22.2) | 490,604<br>(22.8)   | 0.2**               | (0.2-0.3)   |
|                                | Quintiles 2-4    | 1,159,142<br>(50.1) | 522,258<br>(54.2) | 3.6**               | (3.5-3.7)   | 2,896,496<br>(50.9) | 1,039,748<br>(48.3) | 0                   | (0.0-0.0)   |
|                                | Highest Quintile | 558,439<br>(24.2)   | 212,372<br>(22.1) | -2.2**              | (-2.3--2.1) | 1,530,188<br>(26.9) | 623,335<br>(28.94)  | -0.2**              | (-0.3--0.2) |
| 30-Day AMI Mortality           | Lowest Quintile  | 639,880<br>(44.7)   | 218,578<br>(42.9) | 0.6%**              | (0.5-0.6)   | 1,467,033<br>(42.2) | 515,293<br>(39.7)   | 0.3%**              | (0.2-0.3)   |
|                                | Quintiles 2-4    | 416,473<br>(29.1)   | 145,473<br>(28.5) | -0.8%**             | (-0.8--0.6) | 1,058,714<br>(30.5) | 403,472<br>(31.1)   | -0.1%**             | (-0.1-0)    |
|                                | Highest Quintile | 375,205<br>(26.2)   | 145,660<br>(28.6) | -1.1%**             | (-1.1--0.9) | 950,331<br>(27.3)   | 390,838<br>(29.3)   | -0.9%**             | (-0.9--0.8) |
| 30-Day Stroke Mortality        | Lowest Quintile  | 513,453<br>(35.4)   | 181,161<br>(33.9) | -0.2%**             | (-0.2-0)    | 1,409,930<br>(39.3) | 523,621<br>(38.2)   | -0.2%**             | (-0.2--0.1) |
|                                | Quintiles 2-4    | 397,952<br>(27.5)   | 148,400<br>(27.8) | 0.4%**              | (0.3-0.5)   | 1,028,907<br>(28.6) | 387,949<br>(28.3)   | -0.1%**             | (-0.1-0)    |
|                                | Highest Quintile | 538,274<br>(37.1)   | 204,443<br>(38.2) | -1.4%**             | (-1.4--1.2) | 1,153,898<br>(32.1) | 460,065<br>(33.5)   | -0.1%**             | (-0.1-0)    |
| 30-Day CABG Mortality          | Lowest Quintile  | 471,340<br>(42.7)   | 153,775<br>(39.2) | -1.4%**             | (-1.5--1.3) | 902,536<br>(39.3)   | 306,866<br>(35.1)   | -1.1%**             | (-1.1--0.9) |
|                                | Quintiles 2-4    | 369,753<br>(33.5)   | 156,630<br>(39.9) | 0.00%               | (0-0.1)     | 806,390<br>(35.1)   | 350,434<br>(40.1)   | -0.10%              | (-0.1-0)    |
|                                | Highest Quintile | 263,746<br>(20.98)  | 82,399<br>(20.9)  | 0.00%               | (-0.1-0)    | 586,931<br>(25.6)   | 215,988<br>(24.7)   | 0.3%**              | (0.2-0.3)   |
| 30-Day COPD Mortality          | Lowest Quintile  | 533,412<br>(36.6)   | 176,167<br>(44.7) | -1.2%**             | (-1.3--1.1) | 1,387,711<br>(38.5) | 496,181<br>(37.7)   | -0.6%**             | (-0.6--0.5) |
|                                | Quintiles 2-4    | 462,935<br>(31.8)   | 174,332<br>(34.3) | -0.9%**             | (-1--0.8)   | 1,142,315<br>(31.7) | 443,875<br>(33.7)   | -0.6%**             | (-0.6--0.5) |
|                                | Highest Quintile | 461,314<br>(31.7)   | 157,685<br>(31.0) | 1.3%**              | (1.2-1.4)   | 1,076,513<br>(29.9) | 375,797<br>(28.6)   | 0.2%**              | (0.1-0.2)   |
| 30-Day Heart Disease Mortality | Lowest Quintile  | 668,376<br>(45.1)   | 234,036<br>(44.4) | -1.8%**             | (-1.8--1.7) | 1,655,403<br>(45.2) | 598,222<br>(43.6)   | -1.1%**             | (-1.1--1)   |
|                                | Quintiles 2-4    | 406,367<br>(27.4)   | 156,601<br>(29.7) | 0.6%**              | (0.5-0.7)   | 1,081,716<br>(29.3) | 437,341<br>(31.9)   | 0.4%**              | (0.3-0.4)   |
|                                | Highest Quintile | 407,246<br>(27.5)   | 136,381<br>(25.9) | 0.0%**              | (0-0)       | 941,702<br>(25.5)   | 335,853<br>(24.5)   | 0.3%**              | (0.2-0.3)   |
